## Perspective

# Copper management strategies in obligate bacterial symbionts: balancing cost and benefit

 Alex Rivera-Millot,  Luke B. Harrison and  Frédéric J. Veyrier

NIRS-Centre Armand-Frappier Santé Biotechnologie, Bacterial Symbionts Evolution, Laval, Quebec H7V 1B7, Canada

**Correspondence:** Alex Rivera-Millot (alex.rivera-millot@inrs.ca)

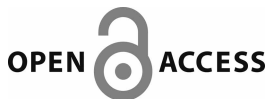

Bacteria employ diverse mechanisms to manage toxic copper in their environments, and these evolutionary strategies can be divided into two main categories: accumulation and rationalization of metabolic pathways. The strategies employed depend on the bacteria's lifestyle and environmental context, optimizing the metabolic cost-benefit ratio. Environmental and opportunistically pathogenic bacteria often possess an extensive range of copper regulation systems in order to respond to variations in copper concentrations and environmental conditions, investing in diversity and/or redundancy as a safeguard against uncertainty. In contrast, obligate symbiotic bacteria, such as *Neisseria gonorrhoeae* and *Bordetella pertussis*, tend to have specialized and more parsimonious copper regulation systems designed to function in the relatively stable host environment. These evolutionary strategies maintain copper homeostasis even in challenging conditions like encounters within phagocytic cells. These examples highlight the adaptability of bacterial copper management systems, tailored to their specific lifestyles and environmental requirements, in the context of an evolutionary trade-off between benefits and energy costs.

## Copper, a toxic yet essential metal...

Since the emergence of life on Earth, metals have played a vital role in numerous biological processes. Iron was initially favored by bacteria due to its bioavailability [1], but ~2.7 billion years ago, the increased presence of oxygen [2], triggered by the emergence of photosynthetic organisms, brought about a significant change [3]. This led to the oxidation of soluble iron into an insoluble form, limiting its availability, setting the stage for other metals soluble in their oxidized state, including copper, and the evolution of numerous diverse metal-based metabolic processes which have become crucial.

Copper is utilized by numerous enzymes involved in various essential metabolic pathways, such as electron transport [4,5], nitrogen metabolism [6,7], degradation of aromatic compounds [8], and oxygen-related reactions. It also plays a critical role in the cytochromes c oxidase of the respiratory chain [9,10], thus contributing to the generation of the proton motive force, the energy source of ATP synthase [11]. However, the evolutionary adoption of copper came with concomitant toxic metabolites. Copper can induce oxidative stress (reactive oxygen species, ROS) by generating highly reactive hydroxyl radicals (OH<sup>·</sup>) through the Fenton-like reaction [12–15]. These OH<sup>·</sup> radicals react swiftly with surrounding molecules including proteins, lipids, and nucleotides. Copper is directly or indirectly responsible for other stresses. It is responsible for the formation of reactive nitrogen species (RNS) [14,16]. It can also displace other metals complexed within proteins, leading to their malfunction, particularly in proteins containing iron-sulfur clusters [17]. Finally, copper can also disrupt protein folding [18] and induce disulfide bridge formation [19,20], both of which may impair protein functions, leading to cellular toxicity.

## Copper at the heart of prokaryote–eukaryote interactions

In the environment, some organisms such as amoebae, have exploited the toxic properties of metals, particularly copper, for preying on bacteria through phagocytosis. One such mechanism that allows

Received: 16 October 2023  
Revised: 22 November 2023  
Accepted: 26 November 2023

Version of Record published:  
14 December 2023

them to subsequently kill their prey is metal poisoning [21]. Phagocytosis is deeply conserved throughout the evolutionary of eukaryotes and has become a crucial component of the immune system of metazoans, including humans. Inflammatory cascades trigger the import of copper in phagocytic cells into phagolysosomes to kill bacteria [22,23]. In the case of humans, the transporter Ctr1 facilitates the import of copper from the extracellular environment [24], which is then managed by the chaperone Atox1 [25,26]. Atox1, in turn, transfers the metal to ATPase ATP7A, which exports cytoplasmic copper into the phagolysosome [22,27]. This metal intoxication works synergistically with other bactericidal factors such as ROS [28,29], RNS [30,31], and indirectly, reactive carbonyl species (RCS) [32–35].

## Defense system accumulation to confront various stresses

Prokaryotic organisms interacting with phagocytic cells have evolved and refined through natural selection strategies for copper detection, tolerance, defense, and detoxification [36] (Figure 1). Yet certain fundamental metabolic processes, like low molecular mass thiols such as glutathione, ubiquitous in all organisms, aid in maintaining cytoplasmic redox balance and limiting copper ion state transitions and their effects [37–39]. Among well studied bacteria, various lifestyles and copper homeostasis strategies have been observed. Bacteria capable of living both free in the environment and inside a host have accumulated a diversity of copper defense mechanisms, some of which exhibit partial redundancy. These mechanisms include systems such as HME-type RND (e.g. CusABC), multicopper oxidases, ATPases, and chelation mechanisms [40]. For example, *Pseudomonas aeruginosa* possesses, in addition to CusABC and PcoAB systems, two independently regulated CopA-type ATPases and two distinct CopZ-type chaperones [41,42]. These different systems are finely regulated by two regulators, CopRS [43], which senses periplasmic copper, and CueR, which senses cytoplasmic copper [41]. Indirect defense mechanisms are also present in *P. aeruginosa*, such as the secretion of pyoverdine and pyochelin, which reduce the toxicity of various metals [44]. Additionally, the repression of copper import proteins like OprC has been observed [45,46]. Other organisms, including *Staphylococcus aureus*, even have mobile genetic elements carrying copper resistance operons, similar to those observed in the context of antibiotic resistance [47,48]. *Salmonella enterica* serovar Typhimurium survives in various environments including the phagolysosome before invading macrophages. This bacterium has two copper ATPases, and a multicopper oxidase CueO (also known as CuiD), but unlike other *Enterobacteriaceae*, *S. enterica* lacks a CusABC-type copper export system [49]. Rather, it has evolved a chelation-based detoxification strategy, involving copper chaperones GolB [50], Csp3 [51], and especially CueP [49,52]. CueP is a periplasmic copper chaperone that largely compensates for the loss of CusABC in terms of copper tolerance [49]. CueP and CusABC appear to have a similar role in metal resistance *in vitro*. However, CueP is more effective in the context of surviving phagocytosis [49]. Despite the accumulation of copper homeostasis systems, some of which are redundant, *S. enterica* appears to have opted for the rationalization of one of these systems by replacing the complex CusABC system with a sole chaperone, CueP. Additionally, *S. enterica* produces and secretes yersiniabactin, a siderophore capable of chelating excess copper the environment [53] and, in the context of an infection, acting as virulence-associated superoxide dismutase mimic [54]. These bacteria have accumulated specific copper defense mechanisms to cope with a range of stresses. In contrast with these examples, there are bacterial genera with an extremely restricted environmental niche. For example, *Neisseria* and *Bordetella pertussis* live almost exclusively on their host's mucosa [55,56]. This highly specific lifestyle appears to be associated with a reduced and optimized genome content which includes specific adaptations for copper homeostasis.

## Copper homeostasis controlled by reactive nitrogen species: the case of *N. gonorrhoeae*

The majority of *Neisseria* species are obligate symbionts that predominantly colonize mucosae of mammalian hosts [57]. Among them, *Neisseria meningitidis* [58] and *Neisseria gonorrhoeae* [59] have been extensively studied due to their pathogenic potential. These bacteria primarily adopt a mucosal-associated extracellular lifestyle with limited intracellular survival capabilities [56]. Analysis of the *N. gonorrhoeae* genome suggests a minimalist copper homeostasis system. This bacterium possesses only the copper chaperone CopZ and the ATPase CopA [40]. Interestingly, this bacterium lacks of the CueR regulator [60], which typically controls the expression of the *copA* and *copZ* genes in gram negative bacteria. Instead, the ATPase is part of a regulon of four genes under the control of the NmlR regulator [60,61]. Comparative genomics suggests that this system is conserved in pathogenic *Neisseria* [62,63]. NmlR is present in several other pathogenic bacteria that colonize the

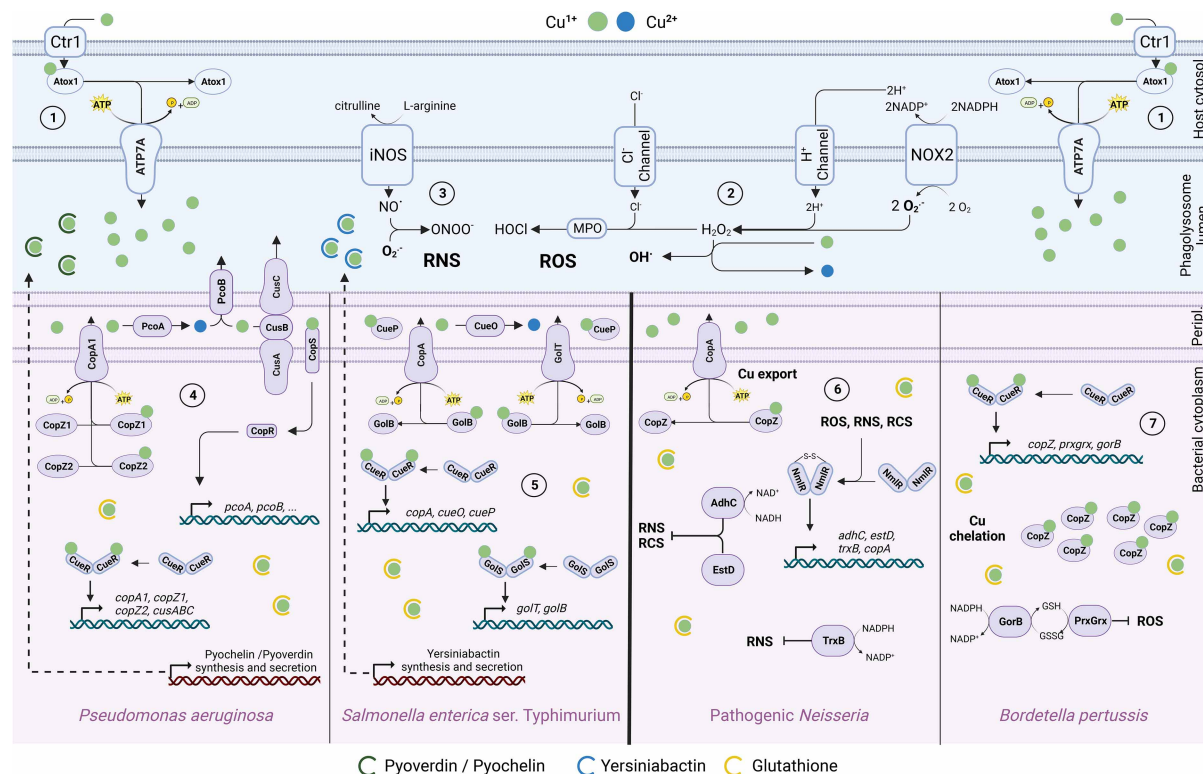

**Figure 1. Copper defense mechanisms and adaptations to copper-related stress induced by phagocytic cells.**

These cells, such as macrophages and neutrophils, generate various forms of stress using copper in the phagolysosome to kill engulfed bacteria. (1) The Ctr1 transporter imports copper into the cytosol, and then the Atox1 chaperone transfers it to ATP7A at the phagolysosome membrane for export into the lumen. (2) NADPH oxidase (NOX2) uses the electron potential of NADPH to produce  $O_2^{\cdot-}$  in the phagolysosome lumen. This superoxide anion allows the formation of hydrogen peroxide and certain RNS. Myeloperoxidase produces HOCl using  $H_2O_2$ . (3) Inducible nitric oxide synthase (iNOS) produces nitric oxide, which leads to various RNS. RCS are produced indirectly by the reaction of ROS and RNS with the organic molecules of the bacterium. The diversity of copper management strategies is depicted in the lower panels. Some bacteria accumulate various homeostasis systems: (4) *P. aeruginosa* possesses two sensor systems, CopRS and CueR, which trigger the expression of disparate copper defense mechanisms. Furthermore, this bacterium can secrete certain molecules such as pyoverdine and pyochelin to buffer copper in the extracellular environment. Other bacteria accumulate redundant systems: (5) *S. enterica* has two closely related regulators, CueR and GolS, of the MerR-type; these regulators control the expression of ATPases and chaperones for copper export and detoxification by chelation. The synthesis and secretion of yersiniabactin also contributes to increased copper tolerance. In contrast, other bacteria exposed to different stresses have rationalized these mechanisms and retain only a minimalist system. (6) Pathogenic *Neisseria* detect reactive species (RS) through the NmlR regulator via disulfide bridge formation. This regulator induces the expression of three RS detoxification genes (*adhC*, *estD*, *trxB*) as well as that of the CopA ATPase copper exporter. (7) *Bordetella pertussis* detects excess copper via the CueR regulator, leading to the production of the CopZ protein capable of detoxifying copper by chelation, as well as two proteins (PrxGrx, GorB) for ROS detoxification utilizing a glutathione redox cycle (reduced: GSH, oxidized: GSSG). In both cases, a single signal triggers multiple responses. The red loci and the dotted arrows represent regulatory and metabolic pathways not detailed here but which play a role in copper tolerance.

mucosae of their hosts, such as *Haemophilus influenzae* [32,35] and *Streptococcus pneumoniae* [64]. NmlR is involved in regulating the response to ROS, RNS, and/or RCS, depending on the organism. In the case of *N. gonorrhoeae*, this regulator appears to respond to RNS. NmlR controls the expression of genes including *adhC* [65–67], *estD* [67,68], *trxB* [69], and the *copA* ATPase gene. Djoko et al. [60], who described this unique regulatory mechanism, demonstrated a deficiency in intracellular survival in the CopA ATPase mutant. They suggested that this NmlR regulon, which detoxifies RNS, ROS, and copper, is beneficial for survival during

phagocytosis, as these three stressors have bactericidal properties. It appears that evolution has led to a rationalization of copper homeostasis mechanisms to cope with specific stresses (Figure 1).

## Defense against oxidative stress under the control of copper: the case of *B. pertussis*

The *Bordetella* genus serves as a model system for studying the evolution of copper homeostasis despite the fact that most *Bordetella* species lack copper defense systems such as CusABC [40,70]. This genus includes bacteria adapted to various environments, with some closely associated with their hosts [71]. For instance, *Bordetella bronchiseptica* can cause respiratory infections in mammals but is able to survive outside the host and resist phagocytosis by both amebas and macrophages [72,73]. Conversely, *Bordetella pertussis*, an obligate symbiont armed with multiple virulence factors, lives primarily on the surface of the human respiratory epithelium [55,74] and has lost many non-essential metabolic pathways [75], including those related to copper [40,76] (Figure 1).

Although *B. bronchiseptica* and *B. pertussis* share several genes related to copper homeostasis, but transcriptomic analyses have revealed that copper defense systems CopI-PcoA-PcoB and CopA are inactive in *B. pertussis* [76]. This bacterium has evolved by deleting portions of its genome and disrupting genes through sequence insertions, particularly IS481, present in several dozen copies [75,77,78]. This evolutionary scenario suggests an ongoing genomic reduction of copper homeostasis systems in *B. pertussis*, as the bacterium is no longer exposed to copper-related stress in the environment and has only retained and refined mechanisms to evade copper-utilizing phagocytic cells [79,80], the last remaining source of copper stress in its niche.

While *B. pertussis* has reduced its copper defense arsenal [40], transcriptomic studies have identified a single remaining system regulated by the copper-sensitive regulator CueR. This system consists of the chaperone CopZ and two proteins involved in detoxifying oxidative stress, a glutathione-dependent peroxidase, and a glutathione reductase [76]. Although the ATPase CopA exporter is inactive due to a sequence insertion, CopZ plays a role in passive detoxification by binding free copper. Even though the other two proteins are not traditionally involved in copper tolerance, they benefit from a more wider dynamic range of regulation through the CueR regulator [76]. This system is specific to situations where copper is present in significant quantities, such as in the phagosome of macrophages, presumably exploiting the fact that in this context, ROS are also used as bactericidal factors [22]. Deletion mutants of this system show a significant decrease in survival after phagocytosis [76]. Outside of these conditions the system is repressed, thus avoiding unnecessary energy expenditure through the synthesis of non-essential proteins during the extracellular multiplication of *B. pertussis* on respiratory mucosa [23,36]. It is interesting to note that the repression of copper importation mechanisms also plays a role in metal tolerance in *B. pertussis*. This bacterium does not secrete siderophores/chalcophores capable of buffering copper but possesses a complex regulatory mechanism, using the CruR protein, leading to strong repression of the TonB-dependent transporter BfrG, hypothesized to be involved in copper import [81]. Therefore, this bacterium has rationalized its copper homeostasis mechanisms by losing non-essential genes and merging the remaining regulon with an oxidative stress defense mechanism (ROS).

## Two strategies: accumulation or rationalization

The evolution of copper homeostasis mechanisms is directly linked to the lifestyle of bacteria. The strength of this relationship is even more pronounced at the host–bacteria interface. Free-living generalist bacteria subjected to environmental stresses have evolved an accumulation of a diverse and/or redundant set of systems to cope with varying conditions. In contrast, specialist bacteria exploiting narrow niches will rationalize their homeostasis mechanisms to both reduce diversity and redundancy to optimize the benefit-to-cost ratio.

### Competing Interests

The authors declare that there are no competing interests associated with the manuscript.

### Acknowledgment

The figure was created with the assistance of Biorender.com.

### Abbreviations

RCS, reactive carbonyl species; RNS, reactive nitrogen species; ROS, reactive oxygen species.



## References

- 1 Crichton, R.R. and Pierre, J.-L. (2001) Old iron, young copper: from Mars to Venus. *Biometals* **14**, 99–112 <https://doi.org/10.1023/A:1016710810701>
- 2 Sessions, A.L., Doughty, D.M., Welander, P.V., Summons, R.E. and Newman, D.K. (2009) The continuing puzzle of the great oxidation event. *Curr. Biol.* **19**, R567–R574 <https://doi.org/10.1016/j.cub.2009.05.054>
- 3 Schirmer, B.E., Guggen, M. and Donoghue, P.C.J. (2015) Cyanobacteria and the great oxidation event: evidence from genes and fossils. *Palaeontology* **58**, 769–785 <https://doi.org/10.1111/pala.12178>
- 4 Cahyono, R.N., Yamanaka, M., Nagao, S., Shibata, N., Higuchi, Y. and Hirota, S. (2020) 3D domain swapping of azurin from *Alcaligenes xylosoxidans*. *Metallomics* **12**, 337–345 <https://doi.org/10.1039/C9MT00255C>
- 5 Scheiber, I.F., Piliátová, J., Malych, R., Kotabova, E., Krijt, M., Vyoral, D. et al. (2019) Copper and iron metabolism in *Ostreococcus tauri* – the role of phytoferritin, plastocyanin and a chloroplast copper-transporting ATPase. *Metallomics* **11**, 1657–1666 <https://doi.org/10.1039/c9mt00078j>
- 6 Barreiro, D.S., Oliveira, R.N.S. and Pauleta, S.R. (2023) Biochemical characterization of the copper nitrite reductase from *Neisseria gonorrhoeae*. *Biomolecules* **13**, 1215 <https://doi.org/10.3390/biom13081215>
- 7 Hein, S., Simon, J. (2019) Chapter four - bacterial nitrous oxide respiration: electron transport chains and copper transfer reactions. In *Advances in Microbial Physiology* (Poole, R.K., ed.), pp. 137–175, Academic Press. (Advances in Microbial Physiology; vol. 75), The University of Sheffield, Firth Court, Western Bank, Sheffield, UK. <https://doi.org/10.1016/bs.ampbs.2019.07.001>
- 8 Janusz, G., Pawlik, A., Świdorska-Burek, U., Polak, J., Sulej, J., Jarosz-Wilkolazka, A. et al. (2020) Laccase properties, physiological functions, and evolution. *Int. J. Mol. Sci.* **21**, 966 <https://doi.org/10.3390/ijms21030966>
- 9 Andrei, A., Di Renzo, M.A., Öztürk, Y., Meisner, A., Daum, N., Frank, F. et al. (2021) The CopA2-Type P1B-Type ATPase CcoI serves as central Hub for cbb3-type cytochrome oxidase biogenesis. *Front. Microbiol.* **12**, 712465 <https://doi.org/10.3389/fmicb.2021.712465>
- 10 Marckmann, D., Trasnea, P.-I., Schimpf, J., Winterstein, C., Andrei, A., Schmollinger, S. et al. (2019) The cbb3-type cytochrome oxidase assembly factor CcoG is a widely distributed cupric reductase. *Proc. Natl Acad. Sci. U.S.A.* **116**, 21166–21175 <https://doi.org/10.1073/pnas.1913803116>
- 11 Lee, H.J., Reimann, J., Huang, Y. and Ådelroth, P. (2012) Functional proton transfer pathways in the heme-copper oxidase superfamily. *Biochim. Biophys. Acta* **1817**, 537–544 <https://doi.org/10.1016/j.bbabi.2011.10.007>
- 12 Dalecki, A.G., Crawford, C.L., Wolschendorf, F. (2017) Chapter six - copper and antibiotics: discovery, modes of action, and opportunities for medicinal applications. In *Advances in Microbial Physiology* (Poole, R.K., ed.), pp. 193–260, Academic Press. (Microbiology of Metal Ions; vol. 70), The University of Sheffield, Firth Court, Western Bank, Sheffield, UK. <https://doi.org/10.1016/bs.ampbs.2017.01.007>
- 13 Solioz, M. (2018) Copper homeostasis in gram-negative bacteria. In *Copper and Bacteria: Evolution, Homeostasis and Toxicity* (Solioz, M., ed.), pp. 49–80, Springer International Publishing, Cham (SpringerBriefs in Molecular Science). [https://doi.org/10.1007/978-3-319-94439-5\\_4](https://doi.org/10.1007/978-3-319-94439-5_4)
- 14 Husain, N. and Mahmood, R. (2019) Copper(II) generates ROS and RNS, impairs antioxidant system and damages membrane and DNA in human blood cells. *Environ. Sci. Pollut. Res.* **26**, 20654–20668 <https://doi.org/10.1007/s11356-019-05345-1>
- 15 Pham, A.N., Xing, G., Miller, C.J. and Waite, T.D. (2013) Fenton-like copper redox chemistry revisited: hydrogen peroxide and superoxide mediation of copper-catalyzed oxidant production. *J. Catal.* **301**, 54–64 <https://doi.org/10.1016/j.jcat.2013.01.025>
- 16 Fang, F.C. and Vázquez-Torres, A. (2019) Reactive nitrogen species in host–bacterial interactions. *Curr. Opin. Immunol.* **60**, 96–102 <https://doi.org/10.1016/j.coi.2019.05.008>
- 17 Macomber, L. and Imlay, J.A. (2009) The iron-sulfur clusters of dehydratases are primary intracellular targets of copper toxicity. *Proc. Natl Acad. Sci. U. S.A.* **106**, 8344–8349 <https://doi.org/10.1073/pnas.0812808106>
- 18 Zuilly, L., Lahrach, N., Fassler, R., Genest, O., Faller, P., Sénèque, O. et al. (2022) Copper induces protein aggregation, a toxic process compensated by molecular chaperones. *mBio* **13**, e03251-21 <https://doi.org/10.1128/mbio.03251-21>
- 19 Hiniker, A., Collet, J.-F. and Bardwell, J.C.A. (2005) Copper stress causes an in vivo requirement for the *Escherichia coli* disulfide isomerase DsbC. *J. Biol. Chem.* **280**, 33785–33791 <https://doi.org/10.1074/jbc.M505742200>
- 20 Durand, A., Azzouzi, A., Bourbon, M.-L., Steunou, A.-S., Liotenberg, S., Maeshima, A. et al. (2015) c-Type cytochrome assembly is a key target of copper toxicity within the bacterial periplasm. *mBio* **6**, 10.1128/mbio.01007-15 <https://doi.org/10.1128/mbio.01007-15>
- 21 Hao, X., Lüthje, F., Rønn, R., German, N.A., Li, X., Huang, F. et al. (2016) A role for copper in protozoan grazing – two billion years selecting for bacterial copper resistance. *Mol. Microbiol.* **102**, 628–641 <https://doi.org/10.1111/mmi.13483>
- 22 White, C., Lee, J., Kambe, T., Fritsche, K. and Petris, M.J. (2009) A role for the ATP7A copper-transporting ATPase in macrophage bactericidal activity. *J. Biol. Chem.* **284**, 33949–33956 <https://doi.org/10.1074/jbc.M109.070201>
- 23 Sheldon, J.R. and Skaar, E.P. (2019) Metals as phagocyte antimicrobial effectors. *Curr. Opin. Immunol.* **60**, 1–9 <https://doi.org/10.1016/j.coi.2019.04.002>
- 24 Ren, F., Logeman, B.L., Zhang, X., Liu, Y., Thiele, D.J. and Yuan, P. (2019) X-ray structures of the high-affinity copper transporter Ctr1. *Nat. Commun.* **10**, 1386 <https://doi.org/10.1038/s41467-019-09376-7>
- 25 Hatori, Y. and Lutsenko, S. (2016) The role of copper chaperone Atox1 in coupling redox homeostasis to intracellular copper distribution. *Antioxidants* **5**, 25 <https://doi.org/10.3390/antiox5030025>
- 26 Hatori, Y., Inoue, S. and Akagi, R. (2017) Thiol-based copper handling by the copper chaperone Atox1. *IUBMB Life* **69**, 246–254 <https://doi.org/10.1002/iub.1620>
- 27 Lutsenko, S. (2021) Dynamic and cell-specific transport networks for intracellular copper ions. *J. Cell Sci.* **134**, jcs240523 <https://doi.org/10.1242/jcs.240523>
- 28 Herb, M. and Schramm, M. (2021) Functions of ROS in macrophages and antimicrobial immunity. *Antioxidants* **10**, 313 <https://doi.org/10.3390/antiox10020313>
- 29 Zhang, X.-W., Oleinick, A., Jiang, H., Liao, Q.-L., Qiu, Q.-F., Svir, I. et al. (2019) Electrochemical monitoring of ROS/RNS homeostasis within individual phagolysosomes inside single macrophages. *Ang. Chem.* **131**, 7835–7838 <https://doi.org/10.1002/ange.201902734>
- 30 Vazquez-Torres, A., Xu, Y., Jones-Carson, J., Holden, D.W., Lucia, S.M., Dinauer, M.C. et al. (2000) Salmonella pathogenicity Island 2-dependent evasion of the phagocyte NADPH oxidase. *Science* **287**, 1655–1658 <https://doi.org/10.1126/science.287.5458.1655>
- 31 Davis, A.S., Vergne, I., Master, S.S., Kyei, G.B., Chua, J. and Deretic, V. (2007) Mechanism of inducible nitric oxide synthase exclusion from mycobacterial phagosomes. *PLoS Pathog.* **3**, e186 <https://doi.org/10.1371/journal.ppat.0030186>

- 32 Kidd, S.P., Jiang, D., Tikhomirova, A., Jennings, M.P. and McEwan, A.G. (2012) A glutathione-based system for defense against carbonyl stress in *Haemophilus influenzae*. *BMC Microbiol.* **12**, 159 <https://doi.org/10.1186/1471-2180-12-159>
- 33 Anderson, M.M., Hazen, S.L., Hsu, F.F. and Heinecke, J.W. (1997) Human neutrophils employ the myeloperoxidase-hydrogen peroxide-chloride system to convert hydroxy-amino acids into glycolaldehyde, 2-hydroxypropanal, and acrolein. A mechanism for the generation of highly reactive alpha-hydroxy and alpha,beta-unsaturated aldehydes by phagocytes at sites of inflammation. *J. Clin. Invest.* **99**, 424–432 <https://doi.org/10.1172/JCI119176> PMID: 9022075
- 34 Okado-Matsumoto, A. and Fridovich, I. (2000) The role of  $\alpha,\beta$ -dicarbonyl compounds in the toxicity of short chain sugars. *J. Biol. Chem.* **275**, 34853–34857 <https://doi.org/10.1074/jbc.M005536200>
- 35 Chen, N.H., Djoko, K.Y., Veyrier, F.J. and McEwan, A.G. (2016) Formaldehyde stress responses in bacterial pathogens. *Front. Microbiol.* **7**, 257 <https://doi.org/10.3389/fmicb.2016.00257>
- 36 Focarelli, F., Giachino, A. and Waldron, K.J. (2022) Copper microenvironments in the human body define patterns of copper adaptation in pathogenic bacteria. *PLOS Pathog.* **18**, e1010617 <https://doi.org/10.1371/journal.ppat.1010617>
- 37 Bhattacharjee, A., Chakraborty, K. and Shukla, A. (2017) Cellular copper homeostasis: current concepts on its interplay with glutathione homeostasis and its implication in physiology and human diseases. *Metalomics* **9**, 1376–1388 <https://doi.org/10.1039/c7mt00066a>
- 38 Helbig, K., Bleuel, C., Krauss, G.J. and Nies, D.H. (2008) Glutathione and transition-metal homeostasis in *Escherichia coli*. *J. Bacteriol.* **190**, 5431–5438 <https://doi.org/10.1128/jb.00271-08>
- 39 Stewart, L.J., Ong, C.Y., Zhang, M.M., Brouwer, S., McIntyre, L., Davies, M.R. et al. (2020) Role of glutathione in buffering excess intracellular copper in *Streptococcus pyogenes*. *mBio* **11**, 10.1128/mbio.02804-20 <https://doi.org/10.1128/mbio.02804-20>
- 40 Antoine, R., Rivera-Millot, A., Roy, G. and Jacob-Dubuisson, F. (2019) Relationships between copper-related proteomes and lifestyles in  $\beta$  proteobacteria. *Front. Microbiol.* **10**, 2217 <https://doi.org/10.3389/fmicb.2019.02217>
- 41 Quintana, J., Novoa-Aponte, L. and Argüello, J.M. (2017) Copper homeostasis networks in the bacterium *Pseudomonas aeruginosa*. *J. Biol. Chem.* **292**, 15691–15704 <https://doi.org/10.1074/jbc.M117.804492>
- 42 Novoa-Aponte, L., Ramírez, D. and Argüello, J.M. (2019) The interplay of the metallosensor CueR with two distinct CopZ chaperones defines copper homeostasis in *Pseudomonas aeruginosa*. *J. Biol. Chem.* **294**, 4934–4945 <https://doi.org/10.1074/jbc.RA118.006316>
- 43 Novoa-Aponte, L., Xu, C., Soncini, F.C. and Argüello, J.M. (2020) The Two-component system CopRS maintains subfemtomolar levels of free copper in the periplasm of *Pseudomonas aeruginosa* using a phosphatase-based mechanism. *mSphere* **5**, 10.1128/msphere.01193-20 <https://doi.org/10.1128/msphere.01193-20>
- 44 Braud, A., Geoffroy, V., Hoegy, F., Mislin, G.L.A. and Schalk, I.J. (2010) Presence of the siderophores pyoverdine and pyochelin in the extracellular medium reduces toxic metal accumulation in *Pseudomonas aeruginosa* and increases bacterial metal tolerance. *Environ. Microbiol. Rep.* **2**, 419–425 <https://doi.org/10.1111/j.1758-2229.2009.00126.x>
- 45 Han, Y., Wang, T., Chen, G., Pu, Q., Liu, Q., Zhang, Y. et al. (2019) A *Pseudomonas aeruginosa* type VI secretion system regulated by CueR facilitates copper acquisition. *PLOS Pathog.* **15**, e1008198 <https://doi.org/10.1371/journal.ppat.1008198>
- 46 Bhamidimarri, S.P., Young, T.R., Shanmugam, M., Soderholm, S., Baslé, A., Bumann, D. et al. (2021) Acquisition of ionic copper by the bacterial outer membrane protein OprC through a novel binding site. *PLOS Biol.* **19**, e3001446 <https://doi.org/10.1371/journal.pbio.3001446>
- 47 Rosario-Cruz, Z., Eletsky, A., Daigham, N.S., Al-Tameemi, H., Swapna, G.V.T., Kahn, P.C. et al. (2019) The copBL operon protects *Staphylococcus aureus* from copper toxicity: CopL is an extracellular membrane-associated copper-binding protein. *J. Biol. Chem.* **294**, 4027–4044 <https://doi.org/10.1074/jbc.RA118.004723>
- 48 Purves, J., Thomas, J., Riboldi, G.P., Zapotoczna, M., Tarrant, E., Andrew, P.W. et al. (2018) A horizontally gene transferred copper resistance locus confers hyper-resistance to antibacterial copper toxicity and enables survival of community acquired methicillin resistant *Staphylococcus aureus* USA300 in macrophages. *Environ. Microbiol.* **20**, 1576–1589 <https://doi.org/10.1111/1462-2920.14088>
- 49 Méndez, A.A.E., Mendoza, J.I., Echarren, M.L., Terán, I., Checa, S.K. and Soncini, F.C. (2022) Evolution of copper homeostasis and virulence in Salmonella. *Front. Microbiol.* **13**, 823176 <https://doi.org/10.3389/fmicb.2022.823176>
- 50 Espariz, M., Checa, S.K., Audero, M.E.P., Pontel, L.B. and Soncini, F.C. (2007) Dissecting the Salmonella response to copper. *Microbiology* **153**, 2989–2997 <https://doi.org/10.1099/mic.0.2007/006536-0>
- 51 Dennison, C., David, S. and Lee, J. (2018) Bacterial copper storage proteins. *J. Biol. Chem.* **293**, 4616–4627 <https://doi.org/10.1074/jbc.TM117.000180>
- 52 Subedi, P., Paxman, J.J., Wang, G., Ukuwela, A.A., Xiao, Z. and Heras, B. (2019) The Scs disulfide reductase system cooperates with the metallochaperone CueP in Salmonella copper resistance. *J. Biol. Chem.* **294**, 15876–15888 <https://doi.org/10.1074/jbc.RA119.010164>
- 53 Chaturvedi, K.S., Hung, C.S., Crowley, J.R., Stapleton, A.E. and Henderson, J.P. (2012) The siderophore yersiniabactin binds copper to protect pathogens during infection. *Nat. Chem. Biol.* **8**, 731–736 <https://doi.org/10.1038/nchembio.1020>
- 54 Chaturvedi, K.S., Hung, C.S., Giblin, D.E., Urushidani, S., Austin, A.M., Dinauer, M.C. et al. (2014) Cupric yersiniabactin is a virulence-associated superoxide dismutase mimic. *ACS Chem. Biol.* **9**, 551–561 <https://doi.org/10.1021/cb400658k>
- 55 Solans, L. and Loch, C. (2019) The role of mucosal immunity in pertussis. *Front. Immunol.* **9**, 3068 <https://doi.org/10.3389/fimmu.2018.03068>
- 56 Mikucki, A., McCluskey, N.R. and Kahler, C.M. (2022) The host-pathogen interactions and epicyellular lifestyle of *Neisseria meningitidis*. *Front. Cell. Infect. Microbiol.* **12**, 862935 <https://doi.org/10.3389/fcimb.2022.862935>
- 57 Diallo, K., MacLennan, J., Harrison, O.B., Msefula, C., Sow, S.O., Daugla, D.M. et al. (2019) Genomic characterization of novel *Neisseria* species. *Sci. Rep.* **9**, 13742 <https://doi.org/10.1038/s41598-019-50203-2>
- 58 Caugant, D.A. and Brynildsrud, O.B. (2020) *Neisseria meningitidis*: using genomics to understand diversity, evolution and pathogenesis. *Nat. Rev. Microbiol.* **18**, 84–96 <https://doi.org/10.1038/s41579-019-0282-6>
- 59 Walker, E., van Niekerk, S., Hanning, K., Kelton, W. and Hicks, J. (2023) Mechanisms of host manipulation by *Neisseria gonorrhoeae*. *Front. Microbiol.* **14**, 1119834 <https://doi.org/10.3389/fmicb.2023.1119834>
- 60 Djoko, K.Y., Franiek, J.A., Edwards, J.L., Falsetta, M.L., Kidd, S.P., Potter, A.J. et al. (2012) Phenotypic characterization of a copA mutant of *Neisseria gonorrhoeae* identifies a link between copper and nitrosative stress. *Infect. Immun.* **80**, 1065–1071 <https://doi.org/10.1128/IAI.06163-11>

- 61 Kidd, S.P., Potter, A.J., Apicella, M.A., Jennings, M.P. and McEwan, A.G. (2005) Nmlr of *Neisseria gonorrhoeae*: a novel redox responsive transcription factor from the MerR family. *Mol. Microbiol.* **57**, 1676–1689 <https://doi.org/10.1111/j.1365-2958.2005.04773.x>
- 62 Kidd, S.P. (2011) Novel regulation in response to host-generated stresses: the MerR family of regulators in pathogenic bacteria. *Stress Response Pathog. Bact.* **19**, 93–114 <https://doi.org/10.1079/9781845937607.0093>
- 63 McEwan, A.G., Djoko, K.Y., Chen, N.H., Couñago, R.L.M., Kidd, S.P., Potter, A.J. et al. (2011) Chapter 1 - Novel Bacterial MerR-like regulators: their role in the response to carbonyl and nitrosative stress. In *Advances in Microbial Physiology* (Poole, R.K., ed.), pp. 1–22, vol. 58, Academic Press, The University of Sheffield, Firth Court, Western Bank, Sheffield, UK <https://doi.org/10.1016/B978-0-12-381043-4.00001-5>
- 64 Fritsch, V.N., Linzner, N., Busche, T., Said, N., Weise, C., Kalinowski, J. et al. (2023) The MerR-family regulator NmlR is involved in the defense against oxidative stress in *Streptococcus pneumoniae*. *Mol. Microbiol.* **119**, 191–207 <https://doi.org/10.1111/mmi.14999>
- 65 Kidd, S.P., Jiang, D., Jennings, M.P. and McEwan, A.G. (2007) Glutathione-dependent alcohol dehydrogenase AdhC Is required for defense against nitrosative stress in *Haemophilus influenzae*. *Infect. Immun.* **75**, 4506–4513 <https://doi.org/10.1128/iai.00487-07>
- 66 Potter, A.J., Kidd, S.P., Jennings, M.P. and McEwan, A.G. (2007) Evidence for distinctive mechanisms of S-nitrosoglutathione metabolism by AdhC in two closely related species, *Neisseria gonorrhoeae* and *Neisseria meningitidis*. *Infect. Immun.* **75**, 1534–1536 <https://doi.org/10.1128/iai.01634-06>
- 67 Chen, N.H., Couñago, R.M., Djoko, K.Y., Jennings, M.P., Apicella, M.A., Kobe, B. et al. (2013) A glutathione-dependent detoxification system is required for formaldehyde resistance and optimal survival of *Neisseria meningitidis* in biofilms. *Antioxid. Redox Signal.* **18**, 743–755 <https://doi.org/10.1089/ars.2012.4749>
- 68 Potter, A.J., Kidd, S.P., Edwards, J.L., Falsetta, M.L., Apicella, M.A., Jennings, M.P. et al. (2009) Esterase D is essential for protection of *Neisseria gonorrhoeae* against nitrosative stress and for bacterial growth during interaction with cervical epithelial cells. *J. Infect. Dis.* **200**, 273–278 <https://doi.org/10.1086/599987>
- 69 Potter, A.J., Kidd, S.P., Edwards, J.L., Falsetta, M.L., Apicella, M.A., Jennings, M.P. et al. (2009) Thioredoxin reductase is essential for protection of *Neisseria gonorrhoeae* against killing by nitric oxide and for bacterial growth during interaction with cervical epithelial cells. *J. Infect. Dis.* **199**, 227–235 <https://doi.org/10.1086/595737>
- 70 Halder, U., Biswas, R., Kabiraj, A., Deora, R., Let, M., Roy, R.K. et al. (2022) Genomic, morphological, and biochemical analyses of a multi-metal resistant but multi-drug susceptible strain of *Bordetella petrii* from hospital soil. *Sci. Rep.* **12**, 8439 <https://doi.org/10.1038/s41598-022-12435-7>
- 71 Soumana I, H., Linz, B. and Harvill, E.T. (2017) Environmental origin of the genus *Bordetella*. *Front. Microbiol.* **8**, 28 <https://doi.org/10.3389/fmicb.2017.00028>
- 72 Ma, L., Linz, B., Caulfield, A.D., Dewan, K.K., Rivera, I. and Harvill, E.T. (2022) Natural history and ecology of interactions between *Bordetella* species and amoeba. *Front. Cell. Infect. Microbiol.* **12**, 798317 <https://doi.org/10.3389/fcimb.2022.798317>
- 73 Taylor-Mulneix, D.L., Bendor, L., Linz, B., Rivera, I., Ryman, V.E., Dewan, K.K. et al. (2017) *Bordetella bronchiseptica* exploits the complex life cycle of *Dictyostelium discoideum* as an amplifying transmission vector. *PLOS Biol.* **15**, e2000420 <https://doi.org/10.1371/journal.pbio.2000420>
- 74 Belcher, T., Dubois, V., Rivera-Millot, A., Locht, C. and Jacob-Dubuisson, F. (2021) Pathogenicity and virulence of *Bordetella pertussis* and its adaptation to its strictly human host. *Virulence* **12**, 2608–2632 <https://doi.org/10.1080/21505594.2021.1980987>
- 75 Parkhill, J., Sebahia, M., Preston, A., Murphy, L.D., Thomson, N., Harris, D.E. et al. (2003) Comparative analysis of the genome sequences of *Bordetella pertussis*, *Bordetella parapertussis* and *Bordetella bronchiseptica*. *Nat. Genet.* **35**, 32–40 <https://doi.org/10.1038/ng1227>
- 76 Rivera-Millot, A., Slupek, S., Chatagnon, J., Roy, G., Saliou, J.-M., Billon, G. et al. (2021) Streamlined copper defenses make *Bordetella pertussis* reliant on custom-made operon. *Commun. Biol.* **4**, 1–12 <https://doi.org/10.1038/s42003-020-01580-2>
- 77 Diavatopoulos, D.A., Cummings, C.A., Schouls, L.M., Brinig, M.M., Relman, D.A. and Mooi, F.R. (2005) *Bordetella pertussis*, the causative agent of whooping cough, evolved from a distinct, human-associated lineage of *B. bronchiseptica*. *PLOS Pathog.* **1**, e45 <https://doi.org/10.1371/journal.ppat.0010045>
- 78 Siguier, P., Gourbeyre, E. and Chandler, M. (2014) Bacterial insertion sequences: their genomic impact and diversity. *FEMS Microbiol. Rev.* **38**, 865–891 <https://doi.org/10.1111/1574-6976.12067>
- 79 Gestal, M.C., Howard, L.K., Dewan, K., Johnson, H.M., Barbier, M., Bryant, C. et al. (2019) Enhancement of immune response against *Bordetella* spp. by disrupting immunomodulation. *Sci. Rep.* **9**, 20261 <https://doi.org/10.1038/s41598-019-56652-z>
- 80 Andreasen, C. and Carbonetti, N.H. (2008) Pertussis toxin inhibits early chemokine production to delay neutrophil recruitment in response to *Bordetella pertussis* respiratory tract infection in mice. *Infect. Immun.* **76**, 5139–5148 <https://doi.org/10.1128/IAI.00895-08>
- 81 Roy, G., Antoine, R., Schwartz, A., Slupek, S., Rivera-Millot, A., Boudvillain, M. et al. (2022) Posttranscriptional regulation by copper with a new upstream open reading frame. *mBio* **13**, e00912-22 <https://doi.org/10.1128/mbio.00912-22>
